# Supplementary material
Source: publisher figshare collection journal article supplement (https://sage.figshare.com/ndownloader/files/14144771)
Supplement: Supplementary file 1 [file 14144771]

**Table 1 Supplement.** Descriptive statistics for the 565 municipalities of New Jersey.

| Variables                                  | Mean     | SD       | Min   | Max    |
|--------------------------------------------|----------|----------|-------|--------|
| Women on the council (%)                   | 22.45    | 17.44    | 0     | 75     |
| Population size (1000 inhabitants)         | 15560.87 | 23575.76 | 5     | 277140 |
| Population density (1000 inh./square mile) | 3472.42  | 5420.85  | 1     | 57145  |
| African Americans (%)                      | 7.68     | 12.21    | 0     | 89     |
| College graduates (%)                      | 37.02    | 17.40    | 0     | 86     |
| Democrats (% registered)                   | 28.57    | 11.32    | 5     | 68     |
| Female head of household (%)               | 25.44    | 7.21     | 0     | 52     |
| Income (\$)                                | 43278.40 | 31766.50 | 10160 | 389450 |
| Senior citizens (% 65+ years)              | 15.14    | 6.77     | 0     | 60     |
| Council size (number of seats)             | 5.51     | 1.25     | 3     | 11     |
| Partisan elections (yes=1, no=0)           | 0.84     | 0.36     | 0     | 1      |
| At large elections (yes=1, no=0)           | 0.89     | 0.32     | 0     | 1      |

*Source:* The websites of the 565 municipalities as of July 2014 and New Jersey Legislative District Data Book (Center for Government Service at Rutgers University).
